# Supplementary material for: Utilizing 5′ UTR Engineering Enables Fine-Tuning of Multiple Genes within Operons to Balance Metabolic Flux in Bacillus subtilis
Source: MDPI journal article supplement (doi:10.3390/biology13040277), 2024-04-19
Supplement: s1 [file s1]

Table S1 Primers used in this study.

| Primer            | Sequence (5'-3')                                                                    |
|-------------------|-------------------------------------------------------------------------------------|
| P43NMK- library-F | TGATGAAAGCTTGGCGTAATCATGG                                                           |
| P43NMK-library-R  | GTGTACATTCCTCTCTTACCTATAATGGTACCG                                                   |
| UTR2-EGFP-F       | GGTAAGAGAGGAATGTACACGAGATTTTCCCAGTTATATTGCATTTTTCCTC                                |
| UTR3-EGFP-F       | GGTAAGAGAGGAATGTACACTTTTTTTAATATAATTTGTTAGAATATTCATAATTTAG<br>TAAAAAAGGAGGAGCGTTATG |
| UTR4-EGFP-F       | GGTAAGAGAGGAATGTACACGTAAAAAAGGAGGAGCGTTATGAGTAAAGGAG                                |
| EGFP-R            | ATTACGCCAAGCTTTCATCACTATTTGTATAGTTCATCCATGCCATGTGTAATCC                             |
| EGFP-N1-F         | GGTAAGAGAGGAATGTACACGTNAAANAGGNGGANC GTNAT<br>GAGTAAAGGAGAAGAAGCTTTTCACTGGAG        |
| EGFP-N2-F         | GGTAAGAGAGGAATGTACACGNAAANAAGNAGGNGCGNTAT<br>GAGTAAAGGAGAAGAAGCTTTTCACTGGAG         |
| EGFP-N3-F         | GGTAAGAGAGGAATGTACACNTAANAAANGAGNAGCNTTAT<br>GAGTAAAGGAGAAGAAGCTTTTCACTGGAG         |
| EGFP-N4-F         | GGTAAGAGAGGAATGTACACGTANAAAANGGANGAGNGTTATGAGTAAAGGAGAAGAAGCTTTTCACTGGAG            |
| EGFP-N-R          | CTATTTGTATAGTTCATCCATGCCATGTGT                                                      |
| G-R-F1            | GGTAAGAGAGGAATGTACACGTAAAAAAGGAGGAGCGTTATGAGTAAAGGAG                                |

|            |                                                                                        |
|------------|----------------------------------------------------------------------------------------|
| G-R-R1     | GTGTACATTCTCTCTTACCTATTTGTATAGTTCATCCATGCCATGTGTAATCC                                  |
| G-R-F2     | TGGCATGGATGAACTATACAAATAGGTAAGAGAGGAATGTACACGTAAAAAAGGAGGAGCG<br>TTATGGTGAGCAAGGGCGAG  |
| G-R-R2     | ATTACGCCAAGCTTTCATCATTACTTGTACAGCTCGTCCATGCC                                           |
| G-R-N1-F2  | TGGCATGGATGAACTATACAAATAGGTAAGAGAGGAATGTACACNTAANAAAANGAGNAGCNTT<br>ATGGTGAGCAAGGGCGAG |
| G-R-N2-F2  | TGGCATGGATGAACTATACAAATAGGTAAGAGAGGAATGTACACGNAAANAAGNAGGNGCGNT<br>ATGGTGAGCAAGGGCGAG  |
| G-R-N3-F2  | TGGCATGGATGAACTATACAAATAGGTAAGAGAGGAATGTACACGTNAAANAGGNGGANCNTN<br>ATGGTGAGCAAGGGCGAG  |
| G-R-N4-F2  | TGGCATGGATGAACTATACAAATAGGTAAGAGAGGAATGTACACGTANAAANGGANGAGNGTT<br>ATGGTGAGCAAGGGCGAG  |
| P43NMK-F   | TGATGAAAGCTTGCGCTAATCATGG                                                              |
| P43NMK-R   | GTGTACATTCTCTCTTACCTATAATGGTACCG                                                       |
| P43NMK-F-F | ATGAGTAAAGGAGAAGAAGCTTTTCACTGGAG                                                       |
| P43NMK-F-R | GTGTACATTCTCTCTTACCTATAATGGTACCG                                                       |
| P43-rib-F  | GGTAAGAGAGGAATGTACACATGGAAGAGTATTATATGAAGCTGGCCTTAG                                    |
| P43-rib-R  | ATTACGCCAAGCTTTCATCATTATTCAAATGAGCGGTTTAAATTTGCCATTTTC                                 |

|               |                                                                                             |
|---------------|---------------------------------------------------------------------------------------------|
| P43-rib-F5-F  | GGTAAGAGAGGAATGTACACGTAAAAAAGGAGGAGCGTTATGGAAGAGTATTATATGAAGCTGGCCTTAG                      |
| ribDEBAH-F1-1 | GGTAAGAGAGGAATGTACACNTAANAAANGAGNAGCNTTATGGAAGAGTATTATATGAAGCTGGCCTTAG                      |
| ribDEBAH-F1-2 | GGTAAGAGAGGAATGTACACGNAAANAAGNAGGNGCGNTATGGAAGAGTATTATATGAAGCTGGCCTTAG                      |
| ribDEBAH-F1-3 | GGTAAGAGAGGAATGTACACGTNAAANAGGNGGANC GTNATGGAAGAGTATTATATGAAGCTGGCCTTAG                     |
| ribDEBAH-F1-4 | GGTAAGAGAGGAATGTACACGTANAAANGGANGAGNGTTATGGAAGAGTATTATATGAAGCTGGCCTTAG                      |
| ribDEBAH-R1   | GTGTACATTCTCTCTTACCTATTCCTTTGTCTGGTTTTGCCGT                                                 |
| ribDEBAH-F2-1 | CCGACAAAGGAATAGGTAAGAGAGGAATGTACACNTAANAAANGAGNAGCNTTATGTTTACAGGAATTATC<br>GAAGAAACAGGC     |
| ribDEBAH-F2-2 | CCGACAAAGGAATAGGTAAGAGAGGAATGTACACGNAAANAAGNAGGNGCGNTATGTTTACAGGAATTATC<br>GAAGAAACAGGC     |
| ribDEBAH-F2-3 | CCGACAAAGGAATAGGTAAGAGAGGAATGTACACGTNAAANAGGNGGANC GTNATGTTTACAGGAATTATC<br>GAAGAAACAGGC    |
| ribDEBAH-F2-4 | CCGACAAAGGAATAGGTAAGAGAGGAATGTACACGTANAAANGGANGAGNGTTATGTTTACAGGAATTATC<br>GAAGAAACAGGC     |
| ribDEBAH-R2   | GTGTACATTCTCTCTTACCTAAAAGCCGTTTTCTGCTTAAGAAGG                                               |
| ribDEBAH-F3-1 | CTTAAGCGAAAACGGCTTTTAGGTAAGAGAGGAATGTACACNTA<br>ANAAANGAGNAGCNTTATGTTTCATCCGATAGAAGAAGCACTG |
| ribDEBAH-F3-2 | CTTAAGCGAAAACGGCTTTTAGGTAAGAGAGGAATGTACACGNAAANAAGNAGGNGCGNTATGTTTCATCC<br>GATAGAAGAAGCACTG |

|               |                                                                                              |
|---------------|----------------------------------------------------------------------------------------------|
| ribDEBAH-F3-3 | CTTAAGCGAAAACGGCTTTTAGGTAAGAGAGGAATGTACACGTNAAANAGGNGGANC GTNATGTTTCATCCG<br>ATAGAAGAAGCACTG |
| ribDEBAH-F3-4 | CTTAAGCGAAAACGGCTTTTAGGTAAGAGAGGAATGTACACGTANAAANGGANGAGNGTTATGTTTCATCCGA<br>TAGAAGAAGCACTG  |
| ribDEBAH-R3   | GTGTACATTCCCTCTCTTACTTAGAAATGAAGTAAATGACCTAGCTTGTTTCATTTTGG                                  |
| ribDEBAH-F4-1 | ACTTCATTTCTAAGTAAGAGAGGAATGTACACNTAANAAANGAGNAGCNTTATGAATATCATACAAGGAAATT<br>TAGTTGGTACAGG   |
| ribDEBAH-F4-2 | ACTTCATTTCTAAGTAAGAGAGGAATGTACACGNAAANAAGNAGGNGCGNTATGAATATCATACAAGGAAATT<br>TAGTTGGTACAGG   |
| ribDEBAH-F4-3 | ACTTCATTTCTAAGTAAGAGAGGAATGTACACGTNAAANAGGNGGANC GTNATGAATATCATACAAGGAAATTT<br>AGTTGGTACAGG  |
| ribDEBAH-F4-4 | ACTTCATTTCTAAGTAAGAGAGGAATGTACACGTANAAANGGANGAGNGTTATGAATATCATACAAGGAAATTT<br>AGTTGGTACAGG   |
| ribDEBAH-F2   | CCGACAAAGGAATAGGTAAGAGAGGAATGTACACGTAAAAAAGGAGGAGCGTTATGTTTACAGGAATTATCGAA<br>GAAACAGGC      |
| ribDEBAH-F3   | CTTAAGCGAAAACGGCTTTTAGGTAAGAGAGGAATGTACACGTAAAAAAGGAGGAGCGTTATGTTTCATCCGATA<br>GAAGAAGCACTG  |
| ribDEBAH-F4   | ACTTCATTTCTAAGTAAGAGAGGAATGTACACGTAAAAAAGGAGGAGCGTTATGAATATCATACAAGGAAATTTA<br>GTTGGTACAGG   |
| ribDEBAH-R4   | ATTACGCCAAGCTTTCATCATTATTCAAATGAGCGGTTTAAATTTGCCATTTTC                                       |

---
