# Supplementary material for: Utilizing 5′ UTR Engineering Enables Fine-Tuning of Multiple Genes within Operons to Balance Metabolic Flux in Bacillus subtilis
Source: MDPI journal article supplement (doi:10.3390/biology13040277), 2024-04-19
Supplement: s1 [file s1]

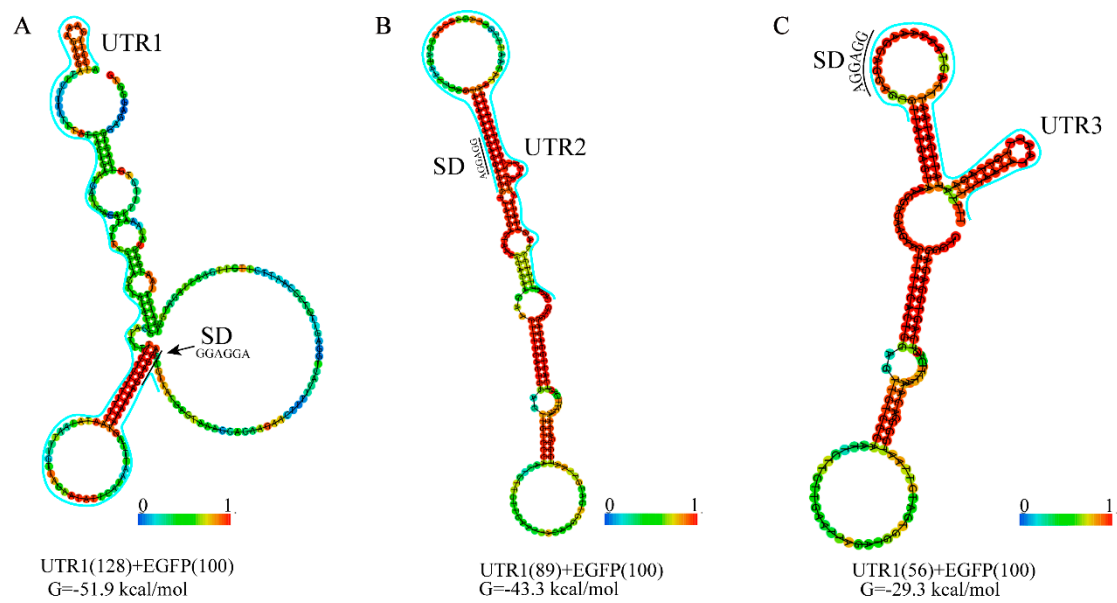

**Figure S1.** Describe the secondary structure of the 5'UTR sequence. The black line highlights the SD sequence, while the blue line represents the UTR sequence. (A) Secondary structure of UTR1-EGFP. (B) Secondary structure of UTR2-EGFP. (C) Secondary structure of UTR3-EGFP.
