# Supplementary material for: Utilizing 5′ UTR Engineering Enables Fine-Tuning of Multiple Genes within Operons to Balance Metabolic Flux in Bacillus subtilis
Source: MDPI journal article supplement (doi:10.3390/biology13040277), 2024-04-19
Supplement: s1 [file s1]

Table S2 Supplementary sequence.

| UTR  | Sequence (5'-3')                                                                                                                                                                                                                                                                                                                                                 |
|------|------------------------------------------------------------------------------------------------------------------------------------------------------------------------------------------------------------------------------------------------------------------------------------------------------------------------------------------------------------------|
| UTR1 | <b>ATCCTTGAAAGAGGATTCTTTTTTATCACTGAATGATTGAGATTTTCCCAGTTATATTGCATTTTTCCTCTTTTTTTAATAT</b><br><b>AATTTGTTAGAATATTCATAATTTAGTAAAAAAGGAGGAGCGTTATGAGTAAAGGAGAAGAAGCTTTTCACTGGAGTTGTCCCAA</b><br><b>TTCTTGTTGAATTAGATGGTGATGTTAATGGGCACAAATTTTCTGTCAGTGGAGAGGGTG</b><br><b>GAGATTTTCCCAGTTATATTGCATTTTTCCTCTTTTTTTAATATAATTTGTTAGAATATTCATAATTTAGTAAAAAAGGAGGAGC</b> |
| UTR2 | <b>GTTATGAGTAAAGGAGAAGAAGCTTTTCACTGGAGTTGTCCCAATTCTTGTTGAATTAGATGGTGATGTTAATGGGCACAAATTTTCT</b><br><b>GTCAGTGGAGAGGGTG</b>                                                                                                                                                                                                                                       |
| UTR3 | <b>TTTTTTTAATATAATTTGTTAGAATATTCATAATTTAGTAAAAAAGGAGGAGCGTTATGAGTAAAGGAGAAGAAGCTTTTCACTGG</b><br><b>AGTTGTCCCAATTCTTGTTGAATTAGATGGTGATGTTAATGGGCACAAATTTTCTGTCAGTGGAGAGGGTG</b>                                                                                                                                                                                  |
| UTR4 | <b>GTAAAAAAGGAGGAGCGTTATGAGTAAAGGAGAAGAAGCTTTTCACTGGAGTTGTCCCAATTCTTGTTGAATTAGATGGTGATGTTA</b><br><b>ATGGGCACAAATTTTCTGTCAGTGGAGAGGGTG</b>                                                                                                                                                                                                                       |

Note: The bold font represents the UTR sequence; The nonbold font represents the 100 bp sequence of EGFP
